# Supplementary material
Source: publisher figshare collection journal article supplement (https://springernature.figshare.com/ndownloader/files/14106485)
Supplement: Supplementary file [file 14106485]

**Additional file 1: Table S1.** ORR according to tumor site subgroups

| <b>Site of primary tumor</b> | <b>n/N</b> | <b>ORR (95% CI)</b> |
|------------------------------|------------|---------------------|
| Non-ocular                   | 11/35      | 31.4 (16.9-49.3)    |
| Cutaneous                    | 8/28       | 28.6 (13.2-48.7)    |
| Mucosal                      | 1/2        | 50.0 (1.3-98.7)     |
| Other <sup>a</sup>           | 2/5        | 40.0 (5.3-85.3)     |
| Ocular                       | 0/16       | 0 (0-20.6)          |

<sup>a</sup> Includes melanoma of the canthus (n=1) and unknown primary (n=4).
